# Supplementary material
Source: PubMed Central journal article supplement (PMC2893229)
Supplement: NIHMS210628-supplement-supplement_data.pdf [file NIHMS210628-supplement-supplement_data.pdf]

Supplement material

## **Building chromosome-wide LD maps**

Maria M. Abad-Grau, Rosana Montes, Paola Sebastiani

<http://bios.ugr.es/BMapBuilder/supplementary/>
